# Supplementary material for: An ultrasensitive electrochemiluminescence biosensor for nuclear factor kappa B p50 based on the proximity hybridization-induced hybridization chain reaction
Source: Royal Society of Chemistry journal article supplement (doi:10.1039/c9cc06210f), 2019-01-01
Supplement: c9cc06210f1.pdf [file c9cc06210f1.pdf]

1

## Supporting Information

### 2 **Ultrasensitive Electrochemiluminescence Biosensor for Nuclear** 3 **Factor kappa B p50 based on Proximity Hybridization-induced** 4 **Hybridization Chain Reaction**

5

6 Xiaocui Huang<sup>a</sup>, Ying Zhang<sup>a</sup>, Wen Xu<sup>b</sup>, Wei Xu<sup>b\*</sup>, Longhua Guo<sup>a</sup>, Bin Qiu<sup>a</sup>, Zhenyu Lin<sup>a\*</sup>

7 <sup>a</sup>Ministry of Education Key Laboratory for Analytical Science of Food Safety and Biology, Fujian

8 Provincial Key Laboratory of Analysis and Detection for Food Safety, College of Chemistry, Fuzhou

9 University, Fuzhou, Fujian, 350116, China.

10 <sup>b</sup>Department of Pharmacy, Fujian University of Traditional Chinese Medicine, Fuzhou,

11 Fujian, 350122, China.

12 Corresponding author: Wei Xu, Zhenyu Lin

13 E-mail: 2000017@fitcm.edu.cn(Wei Xu); zylin@fzu.edu.cn (Zhenyu Lin)

14

## 1 1. Materials and Instruments

### 2 1.1. Materials and reagents

3 Dichlorotris (1,10-phenanthroline) ruthenium (II) hydrate ( $\text{Ru}(\text{phen})_3^{2+}$ ), 1,4-  
4 dithiothreitol (DTT), 6-mercapto-1-hexanol (MCH) and Tripropylamine (TPA) were  
5 provided by Sigma-Aldrich (St. Louis, MO, USA). Lambda exonuclease ( $\lambda$  exo) and its  
6 reaction buffer were purchased from Thermo Fisher Scientific (Shanghai, China). The  
7 purified human recombinant NF- $\kappa$ B p50 was bought from Cayman Chemical (Ann  
8 Arbor, MI, USA). Human GP73 (GP73), alpha fetoprotein (AFP), carcino embryonic  
9 antigen (CEA) and bovine serum albumin (BSA) were obtained from Sigma-Aldrich (St.  
10 Louis, MO, U.S.A.). Oridonin was purchased from Solarbio (Beijing, China). All  
11 oligonucleotides used in this work were provided by Sangon Inc (Shanghai, China) and  
12 their sequences are shown as follows:

13 5'P-DNA1: 5'-P-CACCTGGAAAGTCCCGATCCCACAC-CCTACT-3'

14 DNA2: 5'-GCCTTTACGCCAATATCGGGACTTTCCAG-GTG-3'

15 HP1: 5'-CGCCACCCACACCTGCTAGTAGTAGGGTGT-GGGTGGCGTAAAGGC-3'

16 HP2: 5'-ACTAGCAGGTGTGGGTGGCGGCCTTTACGC-CACCCACACC-3'

17 HP1-SH: 5'-CGCCACCCACACCTGCTAGTAGTAGGGTGTGGGTGGCGTAAAGGCCCCCCC-  
18  $(\text{CH}_2)_6$ -SH -3'

19 Buffer used in this study:

20 Tris-HCl buffer: 10 mM Tris, 10 mM NaCl (pH 7.5).

21 Reaction buffer: 10 mM Tris, 100 mM KCl, 2 mM  $\text{MgCl}_2$ , 0.1 mM EDTA, 0.25 mM DTT  
22 (pH 7.5).

- 1 Binding buffer: 10 mM Tris, 100 mM KCl, 2 mM MgCl<sub>2</sub>, 0.1 mM EDTA, 0.1 mg/mL yeast
- 2 tRNA, 0.25 mM DTT (pH 7.5).

### 3 **1.2. Instruments**

4 The electrochemical and ECL intensity were detected by an electrochemical  
5 workstation (CHI 660D, Chenhua Instruments, Shanghai, China) and a BPCL Ultra-  
6 Weak Luminescence Analyzer (Institute of Biophysics, Chinese Academy of Science,  
7 Beijing, China), respectively. Gel electrophoresis was conducted using a DYY-8C  
8 electrophoretic apparatus (Beijing Liuyi Instrument Factory, Beijing, China) All ECL  
9 measurements were performed on a three-electrode system with Ag/AgCl (3.0 M KCl)  
10 as the reference electrode, platinum wire electrode as the counter electrode, and gold  
11 electrode (diameter = 3 mm) as the working electrode.

### 12 **2. Preparation of HCR Amplification Solution**

13 10 μM 5'-DNA1 and 10 μM DNA2 were mixed in equal volumes, and the mixture  
14 was incubated at 90 °C for 10 min, and then slowly cooled to room temperature to  
15 obtain dsDNA. The above 5'-dsDNA (5 μM, 4 μL) was then mixed with different  
16 concentrations of the target NF-κB p50 in protein binding buffer (10 μL) and incubated  
17 at 37 °C for 30 min. Subsequently, 20 U λ exo and its buffer were added for 30 min  
18 digestion at 37 °C, and the enzyme was inactivated at 75 °C for 20 min. Finally, hairpin  
19 HP1 (10 μM, 10 μL), HP2 (10 μM, 12.5 μL), Ru(phen)<sub>3</sub><sup>2+</sup> (1 mM, 10 μL) and a certain  
20 amount of reaction buffer were added to make a final total volume of 60 μL, and  
21 incubated at 37 °C for 105 min for HCR amplification and to ensure that Ru(phen)<sub>3</sub><sup>2+</sup>  
22 was embedded in the dsDNA grooves. The amplification solution was reserved for

1 further use.

### 2 **3. Modifications of Gold Electrodes and ECL Detection of NF- $\kappa$ B p50**

3 Before modification, the gold electrodes (3 mm in diameter) were polished  
4 sequentially with 0.3  $\mu\text{m}$  and 0.05  $\mu\text{m}$  alumina powder and then sonicated in ethanol  
5 and ultrapure water, respectively. Next, the gold electrode was immersed in 0.5 M  
6 sulfuric acid ( $\text{H}_2\text{SO}_4$ ), and the cyclic voltammetry curve was scanned in the potential  
7 range of 0 ~ 1 V until a stable cyclic voltammogram with three distinct oxidation peaks  
8 and one reduction peak position was obtained. The activated gold electrode was  
9 removed and rinsed with ultrapure water for further use. The hairpin probe HP1-SH1  
10 (1  $\mu\text{M}$ , 10  $\mu\text{L}$ ) was covalently bound to the gold electrode surface by the Au-S bond.  
11 To reduce non-specific adsorption, 1.0 mM MCH was added dropwise to the electrode  
12 surface and allowed to stand at 37  $^\circ\text{C}$  for 45 min to block any nonspecific binding sites.  
13 Finally, the modified gold electrode was immersed in the previously prepared HCR  
14 amplification solution, and incubated at 37  $^\circ\text{C}$  for 1 h. The gold electrode treated in  
15 each of the above steps was rinsed with ultrapure water to remove excess unreacted  
16 and non-specifically adsorbed material.

17 The ECL assay electrolyte was 2 mL phosphate buffer (6.7 mM, pH 7.4) containing  
18 20 mM TPA. The photomultiplier tube was set to -800 V and ECL measurements were  
19 made with a potential range of 0.2 V to 1.6 V and a scan rate of 50 mV/s. All  
20 experiments were repeated three times. Average peak ECL intensity was reported for  
21 all experiments.

### 22 **4. Gel Electrophoresis.**

1 The sensor was characterized by 12% polyacrylamide gel electrophoresis. The  
2 running buffer was 0.5× TBE (pH 8.2), the applied voltage was 80 V, and  
3 electrophoresis was carried out for 120 min at room temperature.

4 A fluorescent dye was prepared by mixing Super Green (100×) with loading buffer  
5 at a volume ratio of 1:1. The DNA reaction product and the dye were mixed in a volume  
6 ratio of 2:1, and incubated at room temperature for 15 min before the mixture was  
7 applied.

#### 8 **5. Impedance Detection..**

9 Impedance analysis was performed using a CHI660D electrochemical analyzer with an  
10 electrolyte of 5.0 mM  $[\text{Fe}(\text{CN})_6]^{3-/4-}$  (containing 100 mM KCl), operating at a voltage of  
11 0.258 V and an impedance frequency range of  $10^{-1} \sim 10^4$  Hz.

12

13

1 **Figure S1**

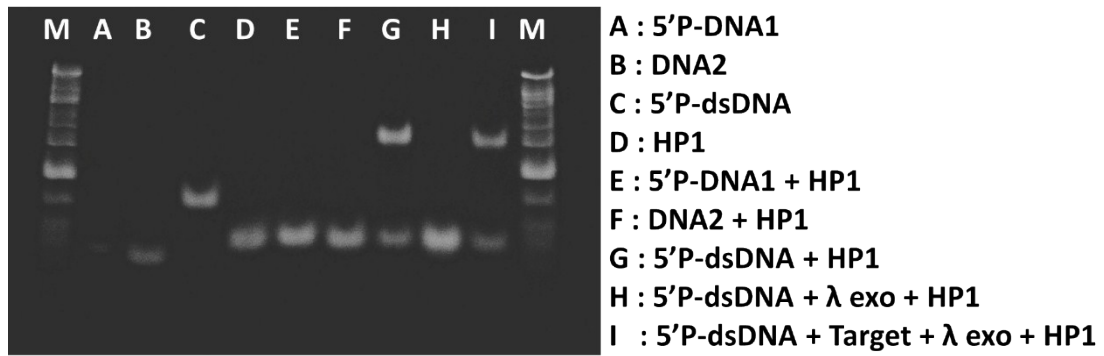

2

3 **Fig. S1** Polyacrylamide gel electrophoresis analysis of the proximity hybridization (M:

4 Marker).

5

1 **Scheme. 2**

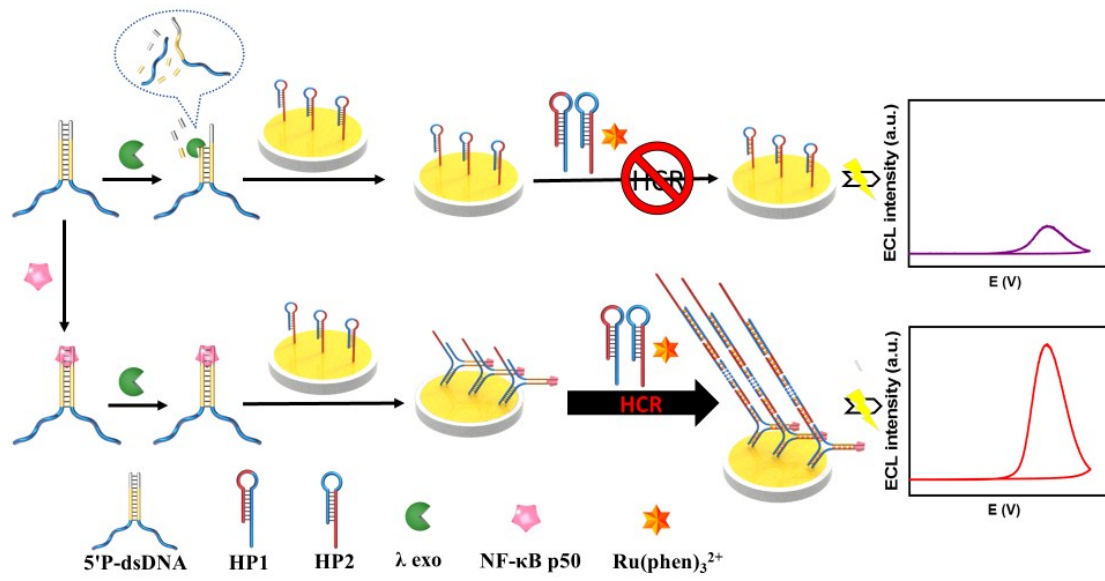

1 **Figure S2**

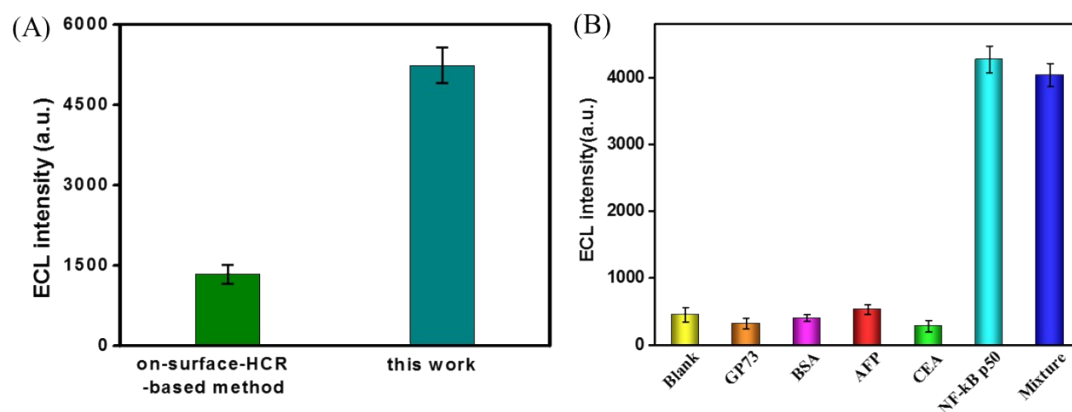

2

3 **Fig.S2** (A) Comparison of ECL intensity between the on-surface-HCR-based method  
4 and the proposed method in the presence of 500 pM NF-κB p50. (B) ECL response in  
5 the presence of 100 pM NF-κB p50 or 10 nM of other analytes. All the detection was  
6 performed in 6.7 mM phosphate buffer (pH 7.4) containing 20 mM TPA. Scan range:  
7 0.2 to 1.6 V. Scan rate: 50 mV/s.

8



1 **Figure S3**

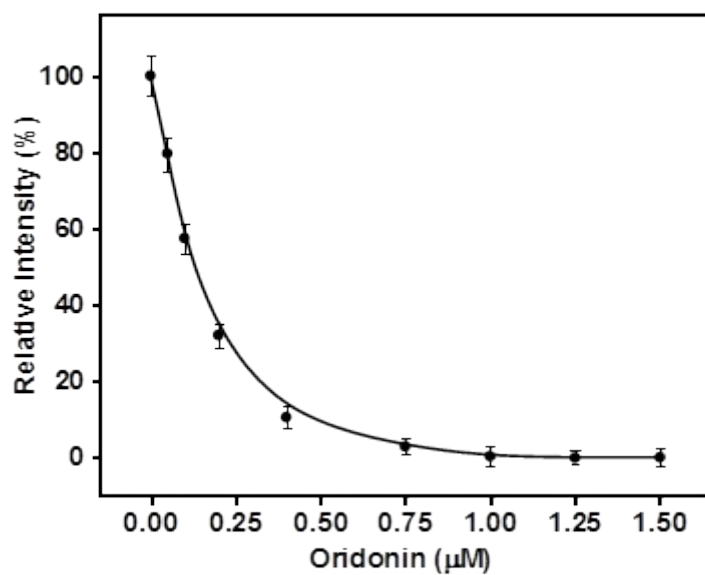

2

3 **Fig.S3** The inhibition effect of oridonin on the  $\Delta$ ECL (different concentrations of  
4 oridonin were incubated with 500 pM of NF- $\kappa$ B p50). The detection was performed in  
5 6.7 mM phosphate buffer (pH 7.4) containing 20 mM TPA. Scan range: 0.2 to 1.6 V.  
6 Scan rate: 50 mV/s.

7

1 **Table S1 Comparison of the proposed method with the reported method for the**  
2 **detection of NF- $\kappa$ B p50**

3

| Method                                              | Dynamic range    | Detection limit |
|-----------------------------------------------------|------------------|-----------------|
| Fluorescence <sup>1</sup>                           | 50 pM to 1 nM    | 45.6 pM         |
| Square Wave Voltammetry <sup>2</sup>                | 200 pM to 1.0 nM | 40 pM           |
| Chronocoulometry <sup>3</sup>                       | 100 pM to 10 nM  | 80 pM           |
| Electrochemical Impedance Spectroscopy <sup>4</sup> | 10 pM to 20 nM   | 7 pM            |
| The on-surface-HCR-based method                     | 100 pM to 50 nM  | 30 pM           |
| The proposed method                                 | 0.5 pM to 300 nM | 0.2 pM          |

4

1 **Table S2 Results of the recovery test of NF- $\kappa$ B p50 in HeLa cell lysates (n = 3)**

2

| Samples | Added   | Total found | Recovery | RSD   |
|---------|---------|-------------|----------|-------|
| 1       | 0       | 0.95 pM     |          |       |
| 2       | 2.50 pM | 3.40 pM     | 98.0%    | 2.87% |
| 3       | 10.0 pM | 11.1 pM     | 102%     | 5.74% |
| 4       | 250 pM  | 244 pM      | 97.2%    | 5.21% |
| 5       | 1.00 nM | 0.969 nM    | 96.8%    | 3.40% |
| 6       | 25.0 nM | 26.0 nM     | 104%     | 4.03% |

3

## 1 References:

- 2 1. K. Du, J. Wu, A. Pan, D. Li, L. Cui and C. Peng, *Anal. Chim. Acta*, 2019, **1068**, 80-86.
- 3 2. J. H. Chen, X. Zhang, S. Cai, D. Wu, J. Lin, C. Li and J. Zhang, *Biosens. Bioelectron.*, 2014, **53**, 12-17.
- 4 3. Z. Ye, B. Zhang, Y. Yang, Z. Wang, X. Zhu and G. Li, *Microchim. Acta*, 2014, **181**, 139-145.
- 5 4. K. Peng, H. Zhao, P. Xie, S. Hu, Y. Yuan, R. Yuan and X. Wu, *Biosens. Bioelectron.*, 2016, **81**, 1-7.
